# Supplementary material for: A fln-2 mutation affects lethal pathology and lifespan in C. elegans
Source: PubMed Central journal article supplement (PMC6841690; doi:10.1038/s41467-019-13062-z), 2019-11-08
Supplement: 41467_2019_13062_MOESM1_ESM.pdf [file 41467_2019_13062_MOESM1_ESM.pdf]

## **A *fln-2* mutation affects lethal pathology and lifespan in *C. elegans***

Zhao et al.

**Supplementary Figure 1.** No phenotypic difference between N2H and N2M.

**Supplementary Figure 2.** Examples of pharynxes showing different stage of infection by OP50-RFP *E. coli*.

**Supplementary Figure 3.** Variant Discovery Mapping result of all chromosomes.

**Supplementary Figure 4.** *fln-2* isoforms and alleles.

**Supplementary Figure 5.** Effect of *fln-2* mutants on P.

**Supplementary Figure 6.** Effects of *fln-2* allele and FUDR on the lifespan effect of *gels3 sir-2.1* over-expression strains.

**Supplementary Figure 7.** Effects of *pkIs1642 sir-2.1* low copy number over-expression on lifespan are FUDR dependent.

**Supplementary Figure 8.** The lifespan effect of *sir-2.1* null mutation.

**Supplementary Table 1.** Mortality deconvolution of N2H and N2M on proliferating and non-proliferating *E. coli*.

**Supplementary Table 2.** Mortality deconvolution of N2H-derived *fln-2(wu308)* Y800\* mutant generated by CRISPR.

**Supplementary Table 3.** *fln-2* genotype of listed strains from *C. elegans* Expression Project (BC strains) and *C. elegans* Gene Knockout Project (FX, RB and VC strains).

**Supplementary Table 4.** Mortality deconvolution of the original *gels3 sir-2.1* overexpression strains

**Supplementary Table 5.** Mortality deconvolution of *gels3 sir-2.1* overexpression strains outcrossed with N2H

**Supplementary Table 6.** Mortality deconvolution of the original *gels3 sir-2.1* overexpression strains without FUDR

**Supplementary Table 7.** Mortality deconvolution of the outcrossed *gels3 sir-2.1* overexpression strains without FUDR

**Supplementary Table 8.** Mortality deconvolution of original and outcrossed *pkIs1642 sir-2.1* overexpression strains with and without FUDR

**Supplementary Table 9.** Mortality deconvolution of *sir-2.1(ok434)* mutant strains.

**Supplementary Table 10.** Mortality deconvolution of *daf-2* and *daf-2;daf-12* strains.

**Supplementary Table 11.** Mortality deconvolution of *eat-2(ad1116)* outcrossed strains.

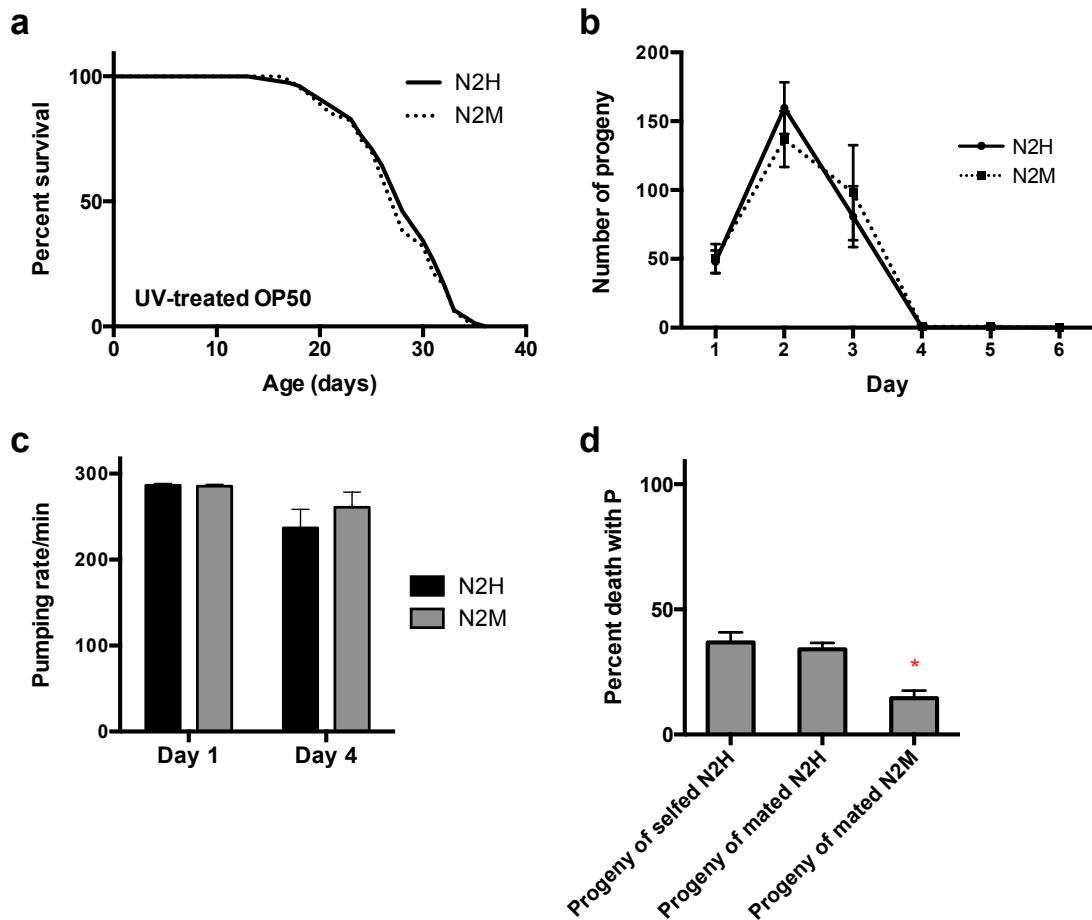

**Supplementary Figure 1.** No phenotypic difference between N2H and N2M.

(a) N2H and N2M showed no significant difference in lifespan on UV-treated bacteria ( $p=0.5672$ , log rank test). Graph shows pooled data from two trials. We noted a significant number of N2M animals dying with a ruptured vulva under this condition, however those animals were censored as in all lifespan experiments.

(b) N2H and N2M showed no significant difference in the timing and numbers of progeny. Error bar represents s.d,  $n = 20$  for each strain. Source data are provided as a Source Data file.

(c) N2H and N2M showed no significant difference in pumping rate in early adulthood (day 1 and day 4) between N2H and N2M. Error bar represents s.e.m.,  $n = 10$  for each strain.

(d) Progeny of mated N2H are not resistant to pharyngeal infection. Error bar represents s.d. of two biological replicates.

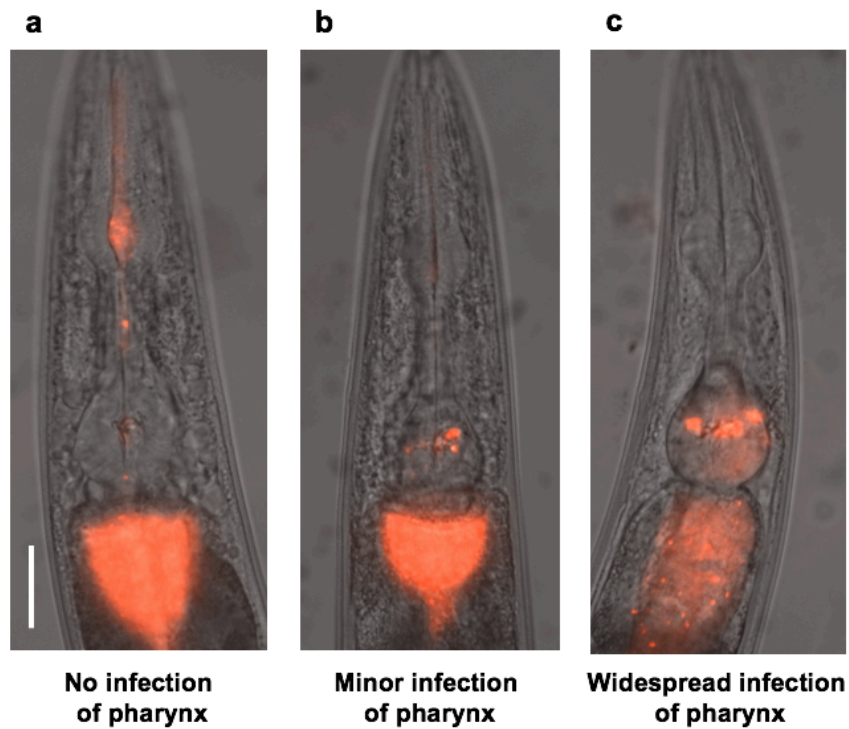

**Supplementary Figure 2.** Examples of pharynxes showing different stage of infection by OP50-RFP *E. coli*.

Worm showing (a) no bacterial invasion, (b) early or contained bacterial invasion, and (c) widespread infection in the posterior pharyngeal bulb. Examples shown are N2H worms on day 8 of adulthood.

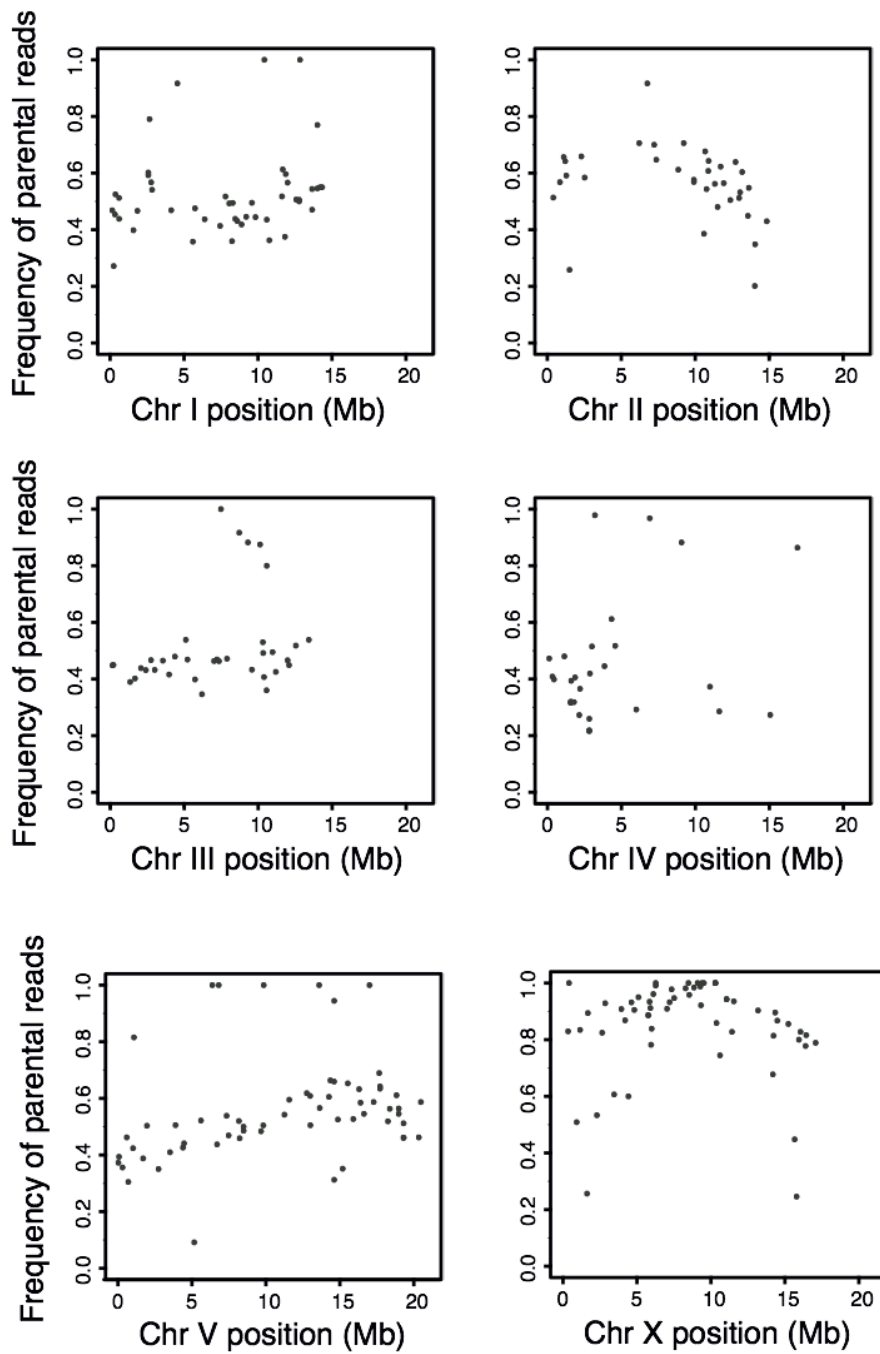

Supplementary Figure 3. Variant Discovery Mapping result of all chromosomes.

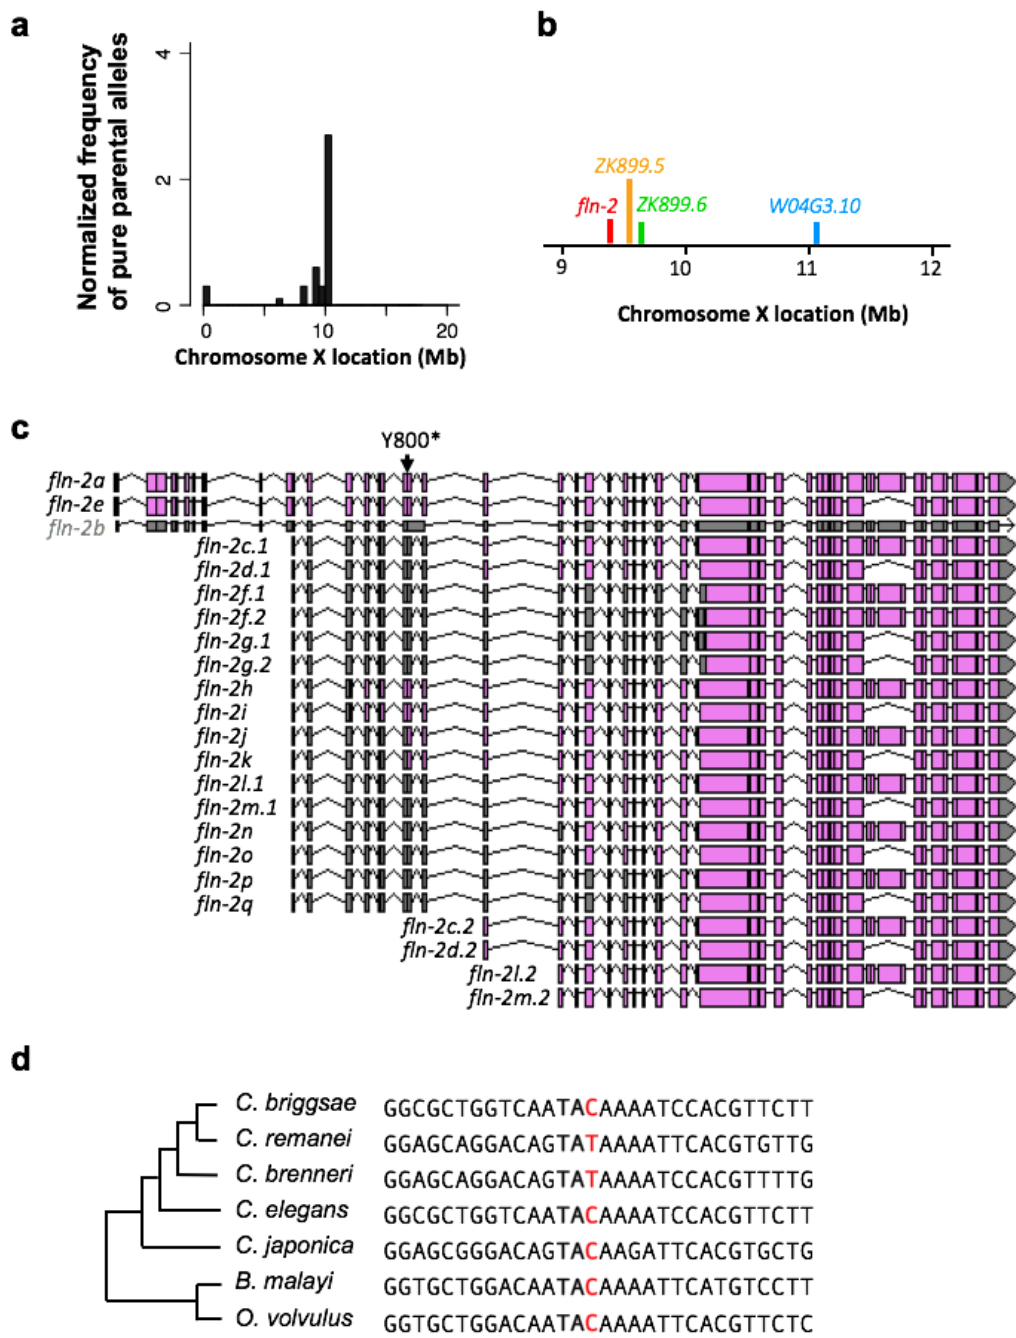

**Supplementary Figure 4. *fln-2* isoforms and alleles.**

- (a) Normalized pure parental (N2M) allele frequency on chromosome X.
- (b) Position of the missense mutations in the 9-12 MB region of chromosome X.
- (c) Position of the nonsense mutation Y800\* in *fln-2*(*ot611*) in relation to different *fln-2* isoforms, adapted from Wormbase.org.
- (d) Sequence alignment of nematode *fln-2* orthologs.

**a**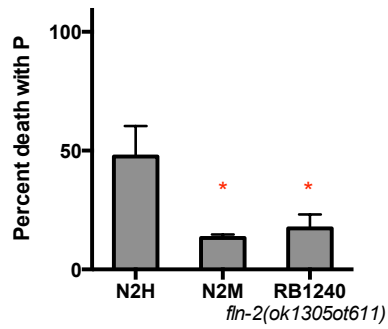**b**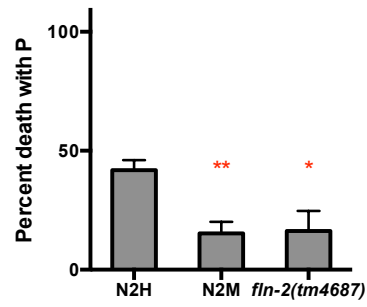**c**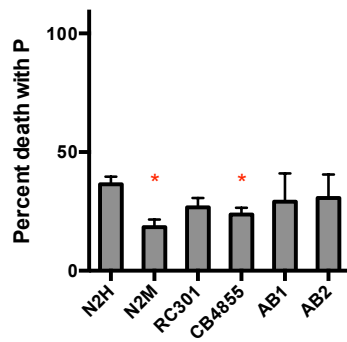

**Supplementary Figure 5.** Effect of *fln-2* mutants on P.

(a) RB1240 *fln-2(ok1305ot611)* is resistant to P death. Error bar represents s.d. of two trials.

Source data are provided as a Source Data file.

(b) FX4687 *fln-2(tm4687)* is resistant to P death. Error bar represents s.d. of two trials.

(c) Frequency of P in *C. elegans* wild isolates. Error bar represents s.e.m. of three trials.

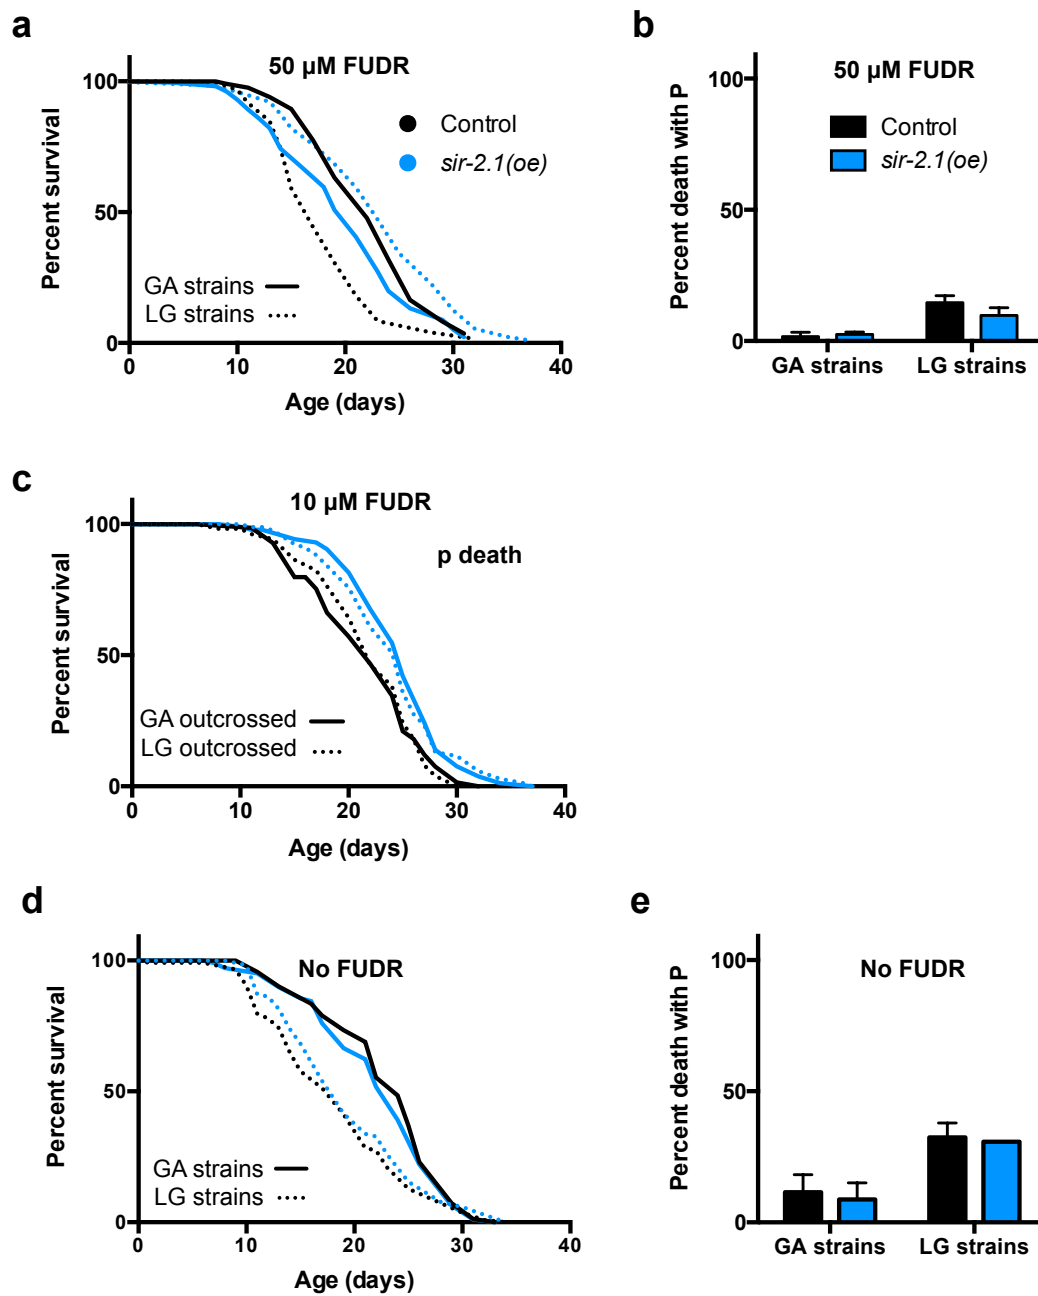

**Supplementary Figure 6.** Effects of *fln-2* allele and FUDR on the lifespan effect of *geIs3 sir-2.1* overexpression strains.

(a) Lifespan and (b) P death frequency of the original strains examined in the 2011 studies<sup>1,2</sup> in the presence of 50  $\mu$ M FUDR. GA strains: GA707 *fln-2(ot611) wuEx166* control (black) and GA468 *geIs3 sir-2.1(oe); fln-2(ot611)* (blue). LG strains: LG398 *geIs101* control (black), LG394 *geIs3 sir-2.1(oe)* (blue).

(c) Lifespan of the p death subpopulation of the outcrossed strains in the presence of 10  $\mu$ M FUDR, related to Fig. 3c.

(d) Lifespan and (e) P death frequency of *sir-2.1* over-expression and control strains as in (a), in the absence of FUDR. See Supplementary Table 6 for full statistics.

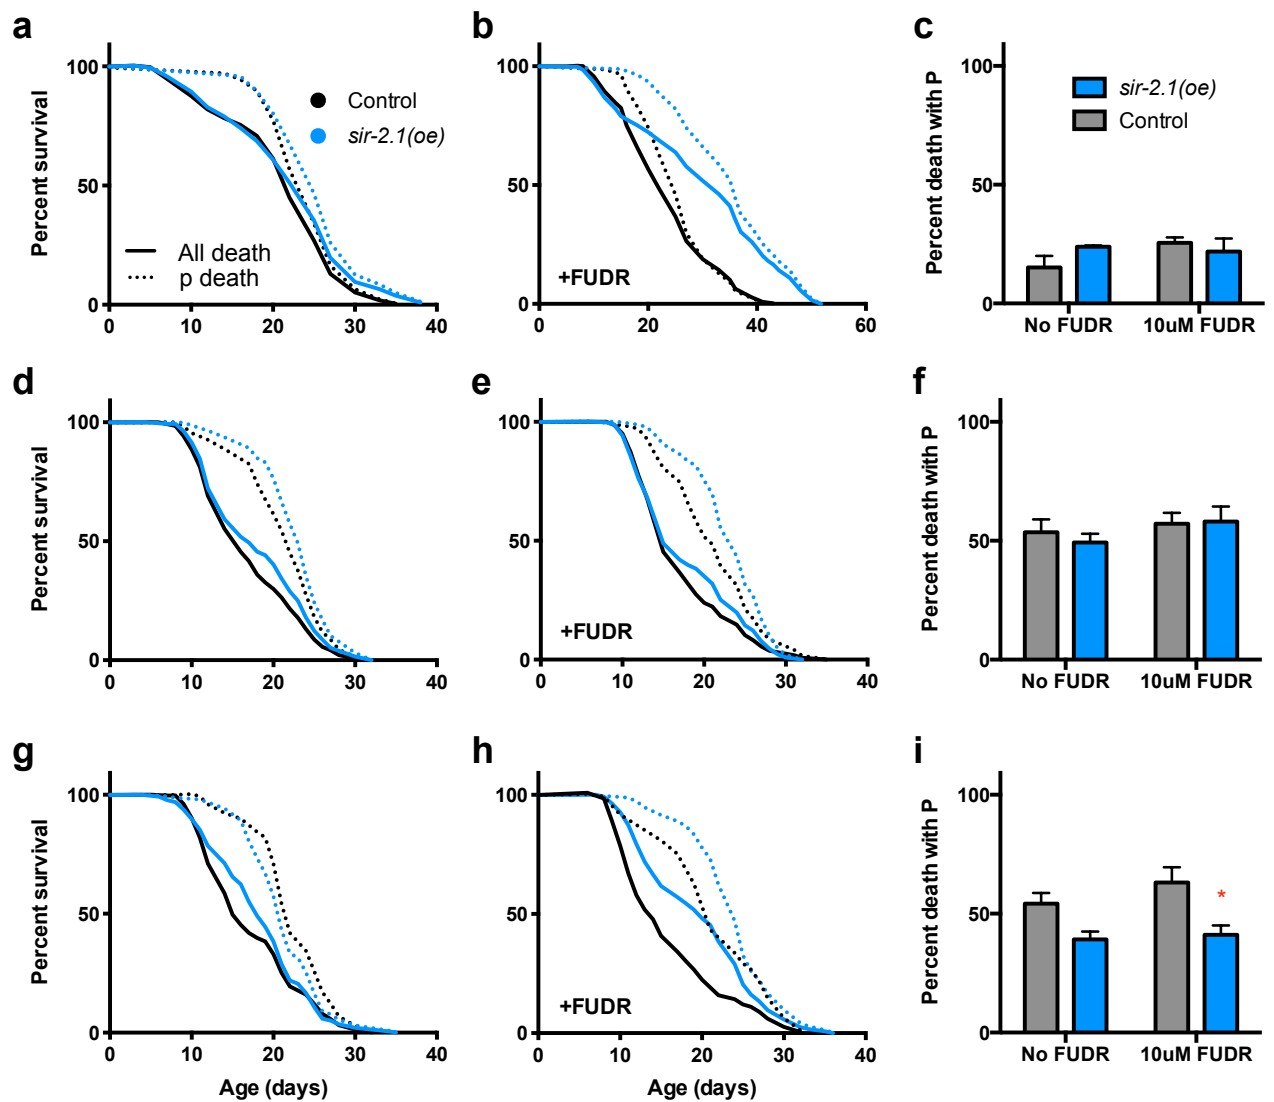

**Supplementary Figure 7.** Effects of *pkIs1642 sir-2.1* low copy number over-expression on lifespan are FUDR dependent.

(a-c) Strains used in the original study<sup>3</sup>: NL3909 *pkIs1642 sir-2.1(oe)* (blue) and NL3908 *pkIs1641* control (black). NL3909 was long lived in the presence (as seen previously<sup>2</sup>) but not the absence of FUDR (similar to another previous study<sup>4</sup>). P death frequency was abnormally low in both strains, although both were found to be *fln-2(+)*, but wild-type P frequency was restored by backcrossing (see f, i), suggesting the presence of further genetic background variation reducing P frequency in NL3909 and NL3908. Here, instead, the FUDR-dependent extension of lifespan by *pkIs1642 sir-2.1(oe)* acts solely by an increase in lifespan.

(d-f) Outcrossed (x2 with HT1593 *unc-119(ed3)*) strains described in a subsequent study: GA905 *pkIs1642 sir-2.1(oe)* (blue) and GA906 *pkIs1641* control (black)<sup>2</sup>. GA905 *sir-2(oe)* was not significantly longer lived than GA906 in the presence (as seen previously<sup>2</sup>) or absence of FUDR, nor was P frequency reduced in GA905.

(g-i) An additional set of independently outcrossed (x2) strains, SCS003 *pkIs1642 sir-2.1(oe)* (blue) and SCS004 *pkIs1641* control (black)<sup>2</sup> behaved similarly, but not identically to GA905 and GA906. In the absence of FUDR, SCS004 *sir-2.1(oe)* showed neither increased lifespan nor reduced P death frequency, consistent with a,c,d,f. However, in the presence of FUDR,



SCS003 *sir-2.1(oe)* showed increased overall lifespan, and reduced P death frequency. Thus, SCS003 *pkIs1642 sir-2.1(oe)* (low copy number) and GA468 *geIn3 sir-2.1(oe)* (high copy number) (Figure 3c,d) are similar in that in both strains *sir-2.1(oe)* is associated with an FUDR-dependent reduction of P frequency that contributes to increased lifespan. One possible reason for the different behavior of GA905 and SCS003 is that, despite backcrossing, the former retains background variation that blocks effects of *sir-2.1* and/or FUDR on pharyngeal infection.

Summed data from two (a-c) or three (d-i) trials; for survival statistics of individual trials, see Supplementary Table 8. Source data are provided as a Source Data file.

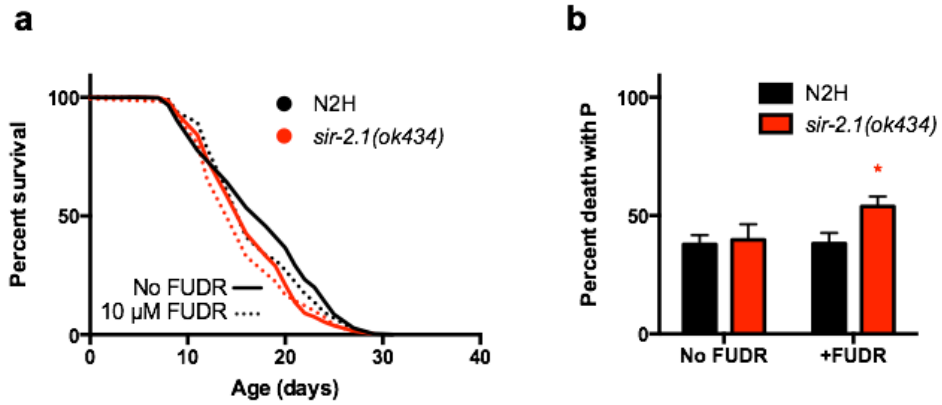

**Supplementary Figure 8.** The lifespan effect of *sir-2.1* null mutation.

(a) Lifespan and (b) P death frequency of outcrossed *sir-2.1(ok434)* mutant, in the presence and absence of FUDR. An increase in P death frequency caused by *sir-2.1* null mutation was only seen in FUDR-treated condition. See Supplementary Table 9 for full statistics. Source data are provided as a Source Data file.

| Strain, treatment             | Number of deaths/<br>censored                                                        | %P                                                   | All deaths                                           |                                                             |                                                                     | P deaths                                             |                                                        |                                                                    | p deaths                                             |                                                      |                                                                    |
|-------------------------------|--------------------------------------------------------------------------------------|------------------------------------------------------|------------------------------------------------------|-------------------------------------------------------------|---------------------------------------------------------------------|------------------------------------------------------|--------------------------------------------------------|--------------------------------------------------------------------|------------------------------------------------------|------------------------------------------------------|--------------------------------------------------------------------|
|                               |                                                                                      |                                                      | Mean lifespan (days)                                 | % change vs. control                                        | p vs. control (log rank)                                            | Mean lifespan (days)                                 | % change vs. control                                   | p vs. control (log rank)                                           | Mean lifespan (days)                                 | % change vs. control                                 | p vs. control (log rank)                                           |
| N2H (control)                 | [C] 335/25<br>[1] 54/1<br>[2] 54/4<br>[3] 53/5<br>[4] 62/6<br>[5] 58/3<br>[6] 54/6   | 36.6<br>33.3<br>31.5<br>28.3<br>59.7<br>31.0<br>46.3 | 18.7<br>18.5<br>19.8<br>19.6<br>17.3<br>18.9<br>17.9 |                                                             |                                                                     | 12.8<br>12.2<br>11.2<br>12.8<br>13.8<br>11.5<br>11.9 |                                                        |                                                                    | 22.6<br>21.7<br>23.8<br>22.3<br>22.4<br>22.2<br>23.4 |                                                      |                                                                    |
| N2M                           | [C] 267/23<br>[1] 60/0<br>[2] 46/5<br>[3] 58/4<br>[4] 103/14<br>[5] 58/4<br>[6] 54/6 | 13.3<br>8.3<br>17.0<br>13.8<br>13.4<br>15.5<br>14.8  | 22.1<br>21.6<br>23.0<br>22.6<br>21.8<br>21.0<br>22.4 | +16.6<br>+16.8<br>+16.2<br>+15.3<br>+26.0<br>+11.1<br>+25.1 | <0.0001<br>0.0105<br>0.0215<br>0.0089<br>0.0001<br>0.1114<br>0.0442 | 13.6<br>11.6<br>12.8<br>14.0<br>14.4<br>11.6<br>14.9 | +6.3<br>-4.9<br>+14.3<br>+9.4<br>+4.3<br>+0.9<br>+24.8 | 0.2260<br>0.5944<br>0.0223<br>0.2366<br>0.1798<br>0.9206<br>0.0725 | 23.5<br>22.5<br>24.5<br>24.0<br>23.3<br>22.8<br>23.7 | +4.0<br>+3.7<br>+2.9<br>+7.6<br>+4.0<br>+2.7<br>+1.3 | 0.1721<br>0.2945<br>0.4843<br>0.0450<br>0.2291<br>0.5692<br>0.6972 |
| N2H + carbenicillin (control) | [C] 169/22<br>[1] 68/1<br>[4] 50/12<br>[6] 51/9                                      | 0<br>0<br>0<br>0                                     | 27.7<br>30.5<br>27.6<br>24.2                         |                                                             |                                                                     |                                                      |                                                        |                                                                    |                                                      |                                                      |                                                                    |
| N2M + carbenicillin           | [C] 157/35<br>[1] 66/2<br>[4] 45/19<br>[6] 46/14                                     | 0<br>0<br>0<br>0                                     | 28.5<br>31.1<br>27.3<br>26.1                         | +2.9<br>+2.0<br>-1.1<br>+7.7                                | 0.3766<br>0.6819<br>0.9909<br>0.1806                                |                                                      |                                                        |                                                                    |                                                      |                                                      |                                                                    |
| N2H UV-treated OP50 (control) | [C] 76/31<br>[7] 37/16<br>[8] 39/15                                                  | 0<br>0<br>0                                          | 27.9<br>27.6<br>28.3                                 |                                                             |                                                                     |                                                      |                                                        |                                                                    |                                                      |                                                      |                                                                    |
| N2M UV-treated OP50           | [C] 66/49<br>[7] 43/22<br>[8] 23/27                                                  | 0<br>0<br>0                                          | 27.5<br>27.5<br>27.4                                 | -1.7<br>-0.4<br>-3.2                                        | 0.5672<br>0.6788<br>0.5875                                          |                                                      |                                                        |                                                                    |                                                      |                                                      |                                                                    |

**Supplementary Table 1.** Mortality deconvolution of N2H and N2M on proliferating and non-proliferating *E. coli*.

Trials were performed at 20°C, with no FUDR. [C], combined data from all trials, [n], trial number. For statistics of P and p subpopulations, animals lost due to internal hatching or vulva rupture were excluded from statistical analysis rather than censored (see Methods). Sample sizes for P and p subpopulations can be estimated from total sample size and %P.

| Strain                      | Number of deaths/<br>censored | %P          | All deaths           |                      |                          | P deaths             |                      |                          | p deaths             |                      |                          |
|-----------------------------|-------------------------------|-------------|----------------------|----------------------|--------------------------|----------------------|----------------------|--------------------------|----------------------|----------------------|--------------------------|
|                             |                               |             | Mean lifespan (days) | % change vs. control | p vs. control (log rank) | Mean lifespan (days) | % change vs. control | p vs. control (log rank) | Mean lifespan (days) | % change vs. control | p vs. control (log rank) |
| N2H (control)               | <b>[C] 177/23</b>             | <b>39.6</b> | <b>18.7</b>          |                      |                          | <b>13.0</b>          |                      |                          | <b>22.7</b>          |                      |                          |
|                             | [1] 62/6                      | 59.7        | 17.3                 |                      |                          | 13.8                 |                      |                          | 22.4                 |                      |                          |
|                             | [2] 58/4                      | 34.5        | 18.7                 |                      |                          | 12.6                 |                      |                          | 21.9                 |                      |                          |
|                             | [3] 57/13                     | 28.1        | 20.2                 |                      |                          | 11.8                 |                      |                          | 23.5                 |                      |                          |
| N2M                         | <b>[C] 218/18</b>             | <b>13.8</b> | <b>22.2</b>          | <b>+18.7</b>         | <b>&lt;0.0001</b>        | <b>14.7</b>          | <b>+13.1</b>         | <b>0.0729</b>            | <b>23.6</b>          | <b>+4.0</b>          | <b>0.3134</b>            |
|                             | [1] 103/14                    | 13.4        | 21.8                 | +26.0                | 0.0001                   | 14.4                 | +4.3                 | 0.6109                   | 23.3                 | +4.0                 | 0.2291                   |
|                             | [2] 57/2                      | 14.0        | 22.4                 | +19.8                | 0.0148                   | 12.6                 | +0.0                 | 0.7200                   | 24.0                 | +9.6                 | 0.1754                   |
|                             | [3] 58/2                      | 13.8        | 22.3                 | +10.4                | 0.0270                   | 15.8                 | +33.5                | 0.0191                   | 23.3                 | -0.9                 | 0.3539                   |
| GA1947 <i>fln-2(syb202)</i> | <b>[C] 169/24</b>             | <b>17.5</b> | <b>21.3</b>          | <b>+13.9</b>         | <b>0.0084</b>            | <b>12.1</b>          | <b>-6.9</b>          | <b>0.1213</b>            | <b>23.2</b>          | <b>+2.2</b>          | <b>0.6961</b>            |
|                             | [1] 58/8                      | 20.7        | 20.2                 | +16.8                | 0.0291                   | 11.5                 | -16.7                | 0.0062                   | 22.5                 | +0.4                 | 0.7792                   |
|                             | [2] 52/6                      | 17.3        | 21.7                 | +16.0                | 0.0489                   | 11.3                 | -10.3                | 0.5251                   | 23.9                 | +9.1                 | 0.2406                   |
|                             | [3] 59/10                     | 15.3        | 21.9                 | +12.3                | 0.1058                   | 13.6                 | +15.3                | 0.1031                   | 23.4                 | +4.0                 | 0.4561                   |

**Supplementary Table 2.** Mortality deconvolution of N2H-derived *fln-2(syb202)* Y800\* mutant generated by CRISPR.

Trials were performed at 20°C, with no FUDR. [C], combined data from all trials, [n], trial number.

| Strain  | <i>fln-2</i> allele | Strain | <i>fln-2</i> allele | Strain | <i>fln-2</i> allele | Strain | <i>fln-2</i> allele |
|---------|---------------------|--------|---------------------|--------|---------------------|--------|---------------------|
| BC3559  | <i>ot611</i>        | FX311  | +                   | RB754  | <i>ot611</i>        | VC172  | <i>ot611</i>        |
| BC4666  | <i>ot611</i>        | FX1146 | +                   | RB925  | <i>ot611</i>        | VC199  | <i>ot611</i>        |
| BC5780  | <i>ot611</i>        | FX4687 | +                   | RB1085 | <i>ot611</i>        | VC281  | +                   |
| BC10060 | <i>ot611</i>        | FX5030 | +                   | RB1206 | <i>ot611</i>        | VC426  | <i>ot611</i>        |
| BC10615 | <i>ot611</i>        | FX5539 | +                   | RB1240 | <i>ot611</i>        | VC557  | +                   |
| BC12677 | <i>ot611</i>        | FX6659 | +                   | RB1288 | <i>ot611</i>        | VC754  | <i>ot611</i>        |
| BC16329 | <i>ot611</i>        |        |                     |        |                     | VC818  | <i>ot611</i>        |
| BC20063 | <i>ot611</i>        |        |                     |        |                     | VC1141 | <i>ot611</i>        |
|         |                     |        |                     |        |                     | VC1801 | +                   |
|         |                     |        |                     |        |                     | VC3072 | +                   |

**Supplementary Table 3.** *fln-2* genotype of listed strains from *C. elegans* Expression Project (BC strains) and *C. elegans* Gene Knockout Project (FX, RB and VC strains).

| Strain                                             | Number of deaths/<br>censored                  | %P                           | All deaths                   |                                  |                                        | P deaths                     |                                  |                                      | p deaths                     |                                 |                                       |
|----------------------------------------------------|------------------------------------------------|------------------------------|------------------------------|----------------------------------|----------------------------------------|------------------------------|----------------------------------|--------------------------------------|------------------------------|---------------------------------|---------------------------------------|
|                                                    |                                                |                              | Mean lifespan (days)         | % change vs. control             | p vs. control (log rank)               | Mean lifespan (days)         | % change vs. control             | p vs. control (log rank)             | Mean lifespan (days)         | % change vs. control            | p vs. control (log rank)              |
| GA707 <i>wuEx166[rol-6] fln-2(ot611)</i> (control) | [C] 151/8<br>[1] 50/6<br>[2] 49/1<br>[3] 52/1  | 15.5<br>24.5<br>12.2<br>9.6  | 21.6<br>20.0<br>22.5<br>22.2 |                                  |                                        | 12.8<br>12.1<br>15.7<br>11.8 |                                  |                                      | 23.6<br>23.8<br>23.4<br>23.3 |                                 |                                       |
| GA468 <i>gels3[sir-2.1 rol-6] fln-2(ot611)</i>     | [C] 140/21<br>[1] 53/7<br>[2] 44/7<br>[3] 43/7 | 10.5<br>15.1<br>6.8<br>9.3   | 21.6<br>23.4<br>20.6<br>20.3 | +0.0<br>+16.6<br>-8.4<br>-8.5    | 0.9583<br>0.0263<br>0.1043<br>0.1597   | 12.4<br>12.0<br>12.7<br>13.0 | -3.1<br>-0.8<br>-19.1<br>+10.2   | 0.4560<br>0.7403<br>0.1066<br>0.6130 | 22.7<br>25.4<br>21.2<br>21.0 | -3.8<br>-6.3<br>-9.4<br>-13.6   | 0.0061<br>0.1874<br>0.0583<br>0.1380  |
| LG398 <i>gels101[rol-6]</i> (control)              | [C] 177/11<br>[1] 56/3<br>[2] 63/1<br>[3] 58/7 | 45.1<br>37.5<br>52.4<br>51.7 | 18.3<br>19.1<br>18.5<br>17.4 |                                  |                                        | 12.2<br>12.7<br>12.4<br>11.6 |                                  |                                      | 23.8<br>23.0<br>24.8<br>23.6 |                                 |                                       |
| LG394 <i>gels3[sir-2.1 rol-6]</i>                  | [C] 171/10<br>[1] 54/6<br>[2] 58/3<br>[3] 59/1 | 26.7<br>20.4<br>31.0<br>30.5 | 23.2<br>23.4<br>24.5<br>21.8 | +26.8<br>+22.5<br>+32.4<br>+25.3 | <0.0001<br>0.0002<br><0.0001<br>0.0005 | 13.9<br>14.1<br>14.9<br>12.8 | +13.9<br>+11.0<br>+20.2<br>+10.3 | 0.0045<br>0.0828<br>0.0287<br>0.1932 | 26.7<br>25.7<br>28.8<br>25.7 | +12.2<br>+11.7<br>+16.1<br>+9.3 | <0.0001<br>0.0026<br>0.0006<br>0.0161 |

**Supplementary Table 4.** Mortality deconvolution of the original *sir-2.1* overexpression strains.

Trials were performed at 20°C, with 10 µM FUDR. [C], combined data from all trials, [n], trial number.

| Strain                                  | Number of deaths/<br>censored                    | %P                           | All deaths                   |                                  |                                          | P deaths                     |                                  |                                       | p deaths                     |                                |                                      |
|-----------------------------------------|--------------------------------------------------|------------------------------|------------------------------|----------------------------------|------------------------------------------|------------------------------|----------------------------------|---------------------------------------|------------------------------|--------------------------------|--------------------------------------|
|                                         |                                                  |                              | Mean lifespan (days)         | % change vs. control             | p vs. control (log rank)                 | Mean lifespan (days)         | % change vs. control             | p vs. control (log rank)              | Mean lifespan (days)         | % change vs. control           | p vs. control (log rank)             |
| GA1907 <i>wuEx166 [rol-6]</i> (control) | [C] 120/5<br>[1] 62/3<br>[2] 58/2                | 44.2<br>43.5<br>44.8         | 18.0<br>18.2<br>17.7         |                                  |                                          | 13.5<br>13.0<br>13.9         |                                  |                                       | 21.5<br>22.3<br>20.7         |                                |                                      |
| GA1909 <i>gels3 [sir-2.1 rol-6]</i>     | [C] 112/18<br>[1] 62/8<br>[2] 50/10              | 29.3<br>27.4<br>32.0         | 21.5<br>22.0<br>20.9         | +19.4<br>+20.9<br>+18.1          | <0.0001<br>0.0022<br>0.0024              | 14.3<br>13.8<br>14.8         | +5.9<br>+6.2<br>+6.5             | 0.2680<br>0.5517<br>0.3319            | 24.5<br>25.0<br>23.8         | +14.0<br>+12.1<br>+15.0        | 0.0016<br>0.0256<br>0.0126           |
| GA1915 <i>gels101 [rol-6]</i> (control) | [C] 177/11<br>[1] 60/2<br>[2] 55/4<br>[3] 62/5   | 55.7<br>50<br>63.6<br>51.6   | 16.4<br>17.2<br>16.0<br>15.9 |                                  |                                          | 12.7<br>12.0<br>13.0<br>13.1 |                                  |                                       | 20.9<br>22.4<br>21.3<br>19.0 |                                |                                      |
| GA1913 <i>gels3 [sir-2.1 rol-6]</i>     | [C] 153/27<br>[1] 51/10<br>[2] 46/13<br>[3] 56/4 | 25.4<br>25.5<br>26.1<br>25.0 | 21.8<br>22.4<br>21.4<br>21.5 | +31.9<br>+30.2<br>+33.8<br>+35.2 | <0.0001<br><0.0001<br><0.0001<br><0.0001 | 16.1<br>15.9<br>16.3<br>16.2 | +26.8<br>+32.5<br>+25.4<br>+23.7 | <0.0001<br>0.0008<br>0.0047<br>0.0054 | 23.7<br>24.6<br>23.3<br>23.3 | +13.4<br>+9.8<br>+9.4<br>+22.6 | 0.0002<br>0.0343<br>0.1580<br>0.0008 |

**Supplementary Table 5.** Mortality deconvolution of *sir-2.1* overexpression strains outcrossed with N2H.

Trials were performed at 20°C, with 10 µM FUDR. [C], combined data from all trials, [n], trial number.

| Strain                                              | Number of deaths/<br>censored | %P          | All deaths           |                      |                          | P deaths             |                      |                          | p deaths             |                      |                          |
|-----------------------------------------------------|-------------------------------|-------------|----------------------|----------------------|--------------------------|----------------------|----------------------|--------------------------|----------------------|----------------------|--------------------------|
|                                                     |                               |             | Mean lifespan (days) | % change vs. control | p vs. control (log rank) | Mean lifespan (days) | % change vs. control | p vs. control (log rank) | Mean lifespan (days) | % change vs. control | p vs. control (log rank) |
| GA707 <i>wuEx166 [rol-6] fln-2(ot611)</i> (control) | <b>[C] 87/23</b>              | <b>11.4</b> | <b>22.8</b>          |                      |                          | <b>12.8</b>          |                      |                          | <b>24.1</b>          |                      |                          |
|                                                     | [1] 44/16                     | 18.2        | 22.2                 |                      |                          | 12.5                 |                      |                          | 24.3                 |                      |                          |
|                                                     | [2] 43/7                      | 4.7         | 23.4                 |                      |                          | 14.0                 |                      |                          | 23.9                 |                      |                          |
| GA468 <i>gels3 [sir-2.1 rol-6] fln-2(ot611)</i>     | <b>[C] 95/15</b>              | <b>8.8</b>  | <b>22.2</b>          | <b>-2.6</b>          | <b>0.4541</b>            | <b>12.6</b>          | <b>-1.6</b>          | <b>0.5091</b>            | <b>23.2</b>          | <b>-3.7</b>          | <b>0.3447</b>            |
|                                                     | [1] 53/7                      | 15.1        | 23.4                 | +5.4                 | 0.2730                   | 12.0                 | -4.0                 | 0.7666                   | 25.4                 | +4.5                 | 0.4129                   |
|                                                     | [2] 42/8                      | 2.4         | 20.8                 | -11.1                | 0.0135                   | 17.0                 | +21.4                | 0.2253                   | 20.9                 | -12.6                | 0.0117                   |
| LG398 <i>gels101 [rol-6]</i> (control)              | <b>[C] 110/11</b>             | <b>32.4</b> | <b>18.3</b>          |                      |                          | <b>12.4</b>          |                      |                          | <b>21.1</b>          |                      |                          |
|                                                     | [1] 58/2                      | 37.9        | 17.1                 |                      |                          | 13.0                 |                      |                          | 19.6                 |                      |                          |
|                                                     | [2] 52/9                      | 26.9        | 19.6                 |                      |                          | 11.5                 |                      |                          | 22.9                 |                      |                          |
| LG394 <i>gels3 [sir-2.1 rol-6]</i>                  | <b>[C] 105/16</b>             | <b>30.8</b> | <b>19.4</b>          | <b>+6.0</b>          | <b>0.2507</b>            | <b>13.2</b>          | <b>+6.5</b>          | <b>0.2702</b>            | <b>22.2</b>          | <b>+5.2</b>          | <b>0.3429</b>            |
|                                                     | [1] 53/8                      | 30.8        | 18.1                 | +5.8                 | 0.5077                   | 12.1                 | -6.9                 | 0.6665                   | 20.7                 | +5.6                 | 0.6979                   |
|                                                     | [2] 52/8                      | 30.8        | 20.8                 | +6.1                 | 0.3428                   | 14.3                 | +24.3                | 0.0032                   | 23.7                 | +4.9                 | 0.2133                   |

**Supplemental Table 6.** Mortality deconvolution of the original *sir-2.1* overexpression strains without FUDR.

Trials were performed at 20°C, with no FUDR. [C], combined data from all trials, [n], trial number.



| Strain                                     | Number of deaths/<br>censored                  | %P                           | All deaths                   |                              |                                      | P deaths                     |                               |                                      | p deaths                     |                                 |                                      |
|--------------------------------------------|------------------------------------------------|------------------------------|------------------------------|------------------------------|--------------------------------------|------------------------------|-------------------------------|--------------------------------------|------------------------------|---------------------------------|--------------------------------------|
|                                            |                                                |                              | Mean lifespan<br>(days)      | % change<br>vs.<br>control   | p vs.<br>control<br>(log rank)       | Mean lifespan<br>(days)      | % change<br>vs.<br>control    | p vs.<br>control<br>(log rank)       | Mean lifespan<br>(days)      | % change<br>vs.<br>control      | p vs.<br>control<br>(log rank)       |
| GA1907 <i>wuEx166 [rol-6]</i><br>(control) | [C] 106/11<br>[1] 51/7<br>[2] 55/4             | 40.3<br>33.3<br>47.3         | 19.5<br>21.1<br>18.0         |                              |                                      | 13.4<br>13.2<br>13.5         |                               |                                      | 23.7<br>25.0<br>22.1         |                                 |                                      |
| GA1909 <i>gels3 [sir-2.1 rol-6]</i>        | [C] 105/11<br>[1] 51/5<br>[2] 54/6             | 42.8<br>39.2<br>48.1         | 17.8<br>19.4<br>16.4         | -8.7<br>-8.1<br>-8.9         | 0.0122<br>0.0273<br>0.1201           | 13.0<br>13.9<br>12.3         | -3.0<br>+5.3<br>-8.9          | 0.7444<br>0.6353<br>0.2649           | 21.6<br>22.9<br>20.1         | -8.9<br>-8.4<br>-9.0            | 0.0054<br>0.0121<br>0.1054           |
| GA1915 <i>gels101 [rol-6]</i> (control)    | [C] 160/14<br>[1] 50/5<br>[2] 55/5<br>[3] 55/4 | 51.6<br>44.0<br>45.5<br>67.3 | 16.1<br>17.9<br>16.1<br>14.6 |                              |                                      | 12.4<br>12.5<br>12.5<br>12.3 |                               |                                      | 20.2<br>22.1<br>19.1<br>19.3 |                                 |                                      |
| GA1913 <i>gels3 [sir-2.1 rol-6]</i>        | [C] 161/14<br>[1] 51/5<br>[2] 55/5<br>[3] 55/4 | 49.1<br>35.3<br>52.7<br>60.0 | 16.8<br>18.4<br>16.3<br>15.9 | +4.3<br>+2.8<br>+1.2<br>+8.9 | 0.2348<br>0.7486<br>0.8403<br>0.1879 | 12.3<br>12.9<br>11.7<br>12.4 | -0.8<br>+3.2<br>-6.4<br>+10.2 | 0.5799<br>0.6058<br>0.1425<br>0.9084 | 22.3<br>21.4<br>21.5<br>21.1 | +10.4<br>-3.2<br>+12.6<br>+15.2 | 0.1258<br>0.7714<br>0.1513<br>0.2425 |

**Supplementary Table 7.** Mortality deconvolution of the outcrossed *sir-2.1* overexpression strains without FUDR. Trials were performed at 20°C, with no FUDR. [C], combined data from all trials, [n], trial number.

| Strain                                                       | Number of deaths/<br>censored                     | %P                           | All deaths                   |                               |                                      | P deaths                     |                              |                                      | p deaths                     |                              |                                      |
|--------------------------------------------------------------|---------------------------------------------------|------------------------------|------------------------------|-------------------------------|--------------------------------------|------------------------------|------------------------------|--------------------------------------|------------------------------|------------------------------|--------------------------------------|
|                                                              |                                                   |                              | Mean lifespan (days)         | % change vs. control          | p vs. control (log rank)             | Mean lifespan (days)         | % change vs. control         | p vs. control (log rank)             | Mean lifespan (days)         | % change vs. control         | p vs. control (log rank)             |
| NL3908 <i>pkIs1641[unc-119(+)] unc-119(ed3)III</i> (control) | [C] 75/40<br>[2] 41/19<br>[3] 34/21               | 17.3<br>22.0<br>11.8         | 22.3<br>21.2<br>23.6         |                               |                                      | 10.8<br>10.4<br>11.5         |                              |                                      | 24.7<br>24.3<br>25.2         |                              |                                      |
| NL3909 <i>pkIs1642[unc-119(+)] sir-2(+)] unc-119</i>         | [C] 74/42<br>[2] 44/16<br>[3] 30/26               | 24.3<br>25.0<br>23.3         | 22.9<br>22.2<br>23.9         | +2.6<br>+4.4<br>+1.4          | 0.2375<br>0.3239<br>0.3661           | 11.8<br>11.5<br>12.4         | +9.9<br>+9.7<br>+8.1         | 0.3654<br>0.3896<br>0.6452           | 26.4<br>25.8<br>27.4         | +7.0<br>+6.1<br>+8.8         | 0.0454<br>0.1777<br>0.0880           |
| GA906 <i>pkIs1641(unc-119[+]) unc-119</i> (control)          | [C] 252/23<br>[1] 52/8<br>[2] 53/7<br>[3] 46/8    | 53.6<br>55.8<br>52.8<br>52.2 | 16.8<br>16.4<br>16.0<br>18.1 |                               |                                      | 12.9<br>13.5<br>12.6<br>12.6 |                              |                                      | 21.3<br>20.1<br>19.9<br>24.0 |                              |                                      |
| GA905 <i>pkIs1642[unc-119(+)] sir-2(+)] unc-119</i>          | [C] 158/17<br>[1] 55/5<br>[2] 59/1<br>[3] 44/11   | 49.4<br>54.5<br>47.5<br>45.5 | 18.1<br>17.3<br>17.3<br>20.1 | +7.6<br>+5.3<br>+7.7<br>+11.2 | 0.0864<br>0.6460<br>0.8766<br>0.1179 | 13.1<br>13.8<br>12.7<br>12.6 | +1.5<br>+2.4<br>+0.9<br>+0.1 | 0.7829<br>0.6629<br>0.3152<br>0.8348 | 22.9<br>21.5<br>21.4<br>26.3 | +7.7<br>+6.7<br>+7.6<br>+9.5 | 0.1007<br>0.9644<br>0.2997<br>0.0735 |
| SCS004 <i>pkIs1641(unc-119[+]) unc-119</i> (control)         | [C] 154/21<br>[1] 52/8<br>[2] 53/7<br>[3] 49/6    | 54.5<br>61.5<br>60.4<br>40.8 | 17.2<br>16.4<br>15.8<br>19.5 |                               |                                      | 12.9<br>13.0<br>12.5<br>13.3 |                              |                                      | 22.3<br>21.8<br>20.8<br>23.8 |                              |                                      |
| SCS003 <i>pkIs1642[unc-119(+)] sir-2(+)] unc-119</i>         | [C] 124/51<br>[1] 50/10<br>[2] 29/31<br>[3] 45/10 | 34.7<br>44.0<br>44.8<br>31.1 | 18.3<br>17.7<br>17.1<br>19.7 | +6.6<br>+8.4<br>+8.1<br>+1.0  | 0.2874<br>0.4142<br>0.6066<br>0.8917 | 12.6<br>13.2<br>12.2<br>12.1 | -2.3<br>+1.6<br>-2.8<br>-8.4 | 0.6062<br>0.7252<br>0.4883<br>0.3871 | 21.3<br>21.3<br>21.1<br>23.1 | -4.4<br>-2.2<br>+1.2<br>-2.9 | 0.1881<br>0.5019<br>0.5880<br>0.5821 |

| Strain, treatment                                                | Number of deaths/<br>censored       | %P                   | All deaths           |                         |                               | P deaths             |                       |                            | p deaths             |                         |                               |
|------------------------------------------------------------------|-------------------------------------|----------------------|----------------------|-------------------------|-------------------------------|----------------------|-----------------------|----------------------------|----------------------|-------------------------|-------------------------------|
|                                                                  |                                     |                      | Mean lifespan (days) | % change vs. control    | p vs. control (log rank)      | Mean lifespan (days) | % change vs. control  | p vs. control (log rank)   | Mean lifespan (days) | % change vs. control    | p vs. control (log rank)      |
| NL3908 <i>pkIs1641(unc-119[+]) unc-119(ed3) + FUDR</i> (control) | [C] 89/30<br>[2] 47/14<br>[3] 42/16 | 26.7<br>29.8<br>23.1 | 23.1<br>21.3<br>25.1 |                         |                               | 15.0<br>13.9<br>16.7 |                       |                            | 26.0<br>24.5<br>27.6 |                         |                               |
| NL3909 <i>pkIs1642[unc-119(+)] sir-2(+)] unc-119 + FUDR</i>      | [C] 114/7<br>[2] 58/5<br>[3] 56/2   | 24.6<br>24.1<br>25.0 | 30.3<br>27.3<br>33.3 | +31.2<br>+28.0<br>+32.6 | <0.0001<br><0.0001<br><0.0001 | 14.8<br>12.1<br>17.6 | -1.2<br>-12.8<br>+4.7 | 0.6028<br>0.1494<br>0.9828 | 35.3<br>32.2<br>38.6 | +35.7<br>+31.2<br>+39.6 | <0.0001<br><0.0001<br><0.0001 |
| GA906 <i>pkIs1641(unc-119[+]) unc-119 + FUDR</i> (control)       | [C] 155/21<br>[1] 51/9<br>[2] 55/5  | 56.8<br>47.1<br>54.5 | 16.8<br>18.2<br>16.2 |                         |                               | 13.5<br>13.3<br>12.8 |                       |                            | 21.2<br>22.6<br>20.2 |                         |                               |

|                                                                 |                   |             |             |              |                   |             |              |               |             |              |               |
|-----------------------------------------------------------------|-------------------|-------------|-------------|--------------|-------------------|-------------|--------------|---------------|-------------|--------------|---------------|
|                                                                 | [3] 49/7          | 69.4        | 16.2        |              |                   | 14.4        |              |               | 20.3        |              |               |
| GA905 <i>pkIs1642[unc-119(+)<br/>sir-2(+)] unc-119 + FUDR</i>   | <b>[C] 157/19</b> | <b>56.1</b> | <b>17.6</b> | <b>+4.4</b>  | <b>0.3928</b>     | <b>13.2</b> | <b>-2.5</b>  | <b>0.5136</b> | <b>23.2</b> | <b>+8.5</b>  | <b>0.1847</b> |
|                                                                 | [1] 48/12         | 41.7        | 19.0        | +4.5         | 0.9227            | 13.7        | +3.4         | 0.4576        | 22.8        | +1.0         | 0.4509        |
|                                                                 | [2] 58/2          | 63.8        | 16.4        | +1.6         | 0.9275            | 12.4        | -3.1         | 0.4438        | 23.6        | +16.5        | 0.1643        |
|                                                                 | [3] 51/5          | 60.8        | 17.5        | +8.2         | 0.2704            | 13.8        | -4.0         | 0.4761        | 23.3        | +14.7        | 0.1312        |
| SCS004 <i>pkIs1641(unc-119[+])<br/>unc-119 + FUDR (control)</i> | <b>[C] 157/20</b> | <b>63.1</b> | <b>15.6</b> |              |                   | <b>12.2</b> |              |               | <b>21.4</b> |              |               |
|                                                                 | [1] 55/5          | 65.5        | 15.3        |              |                   | 11.4        |              |               | 22.5        |              |               |
|                                                                 | [2] 57/3          | 54.4        | 14.7        |              |                   | 11.1        |              |               | 19.1        |              |               |
|                                                                 | [3] 45/12         | 71.1        | 17.2        |              |                   | 14.3        |              |               | 24.3        |              |               |
| SCS003 <i>pkIs1642[unc-119(+)<br/>sir-2(+)] unc-119 + FUDR</i>  | <b>[C] 157/20</b> | <b>42.7</b> | <b>19.4</b> | <b>+24.4</b> | <b>&lt;0.0001</b> | <b>13.5</b> | <b>+10.3</b> | <b>0.0020</b> | <b>23.8</b> | <b>+11.5</b> | <b>0.1246</b> |
|                                                                 | [1] 47/13         | 40.4        | 19.7        | +29.3        | 0.0059            | 13.7        | +20.3        | 0.0001        | 23.8        | +5.6         | 0.9540        |
|                                                                 | [2] 56/4          | 51.8        | 17.4        | +18.0        | 0.0065            | 13.0        | +17.2        | 0.0046        | 22.1        | +15.9        | 0.0099        |
|                                                                 | [3] 54/3          | 35.2        | 21.3        | +23.9        | 0.0227            | 14.1        | -1.6         | 0.6717        | 25.2        | +3.7         | 0.8052        |

**Supplementary Table 8.** Mortality deconvolution of original and outcrossed *pkIs1642 sir-2.1* overexpression strains with and without FUDR.

Trials were performed at 20°C, with 10 µM or no FUDR. [C], combined data from all trials, [n], trial number.

| Strain, treatment                   | Number of deaths/<br>censored                    | %P                           | All death                    |                               |                                      | P death                      |                                 |                                      | p death                      |                                |                                       |
|-------------------------------------|--------------------------------------------------|------------------------------|------------------------------|-------------------------------|--------------------------------------|------------------------------|---------------------------------|--------------------------------------|------------------------------|--------------------------------|---------------------------------------|
|                                     |                                                  |                              | Mean lifespan (days)         | % change vs. control          | p vs. control (log rank)             | Mean lifespan (days)         | % change vs. control            | p vs. control (log rank)             | Mean lifespan (days)         | % change vs. control           | p vs. control (log rank)              |
| N2H (control)                       | [C] 164/17<br>[1] 54/6<br>[2] 58/3<br>[3] 52/8   | 37.9<br>31.5<br>31.0<br>42.3 | 18.0<br>17.9<br>18.9<br>17.0 |                               |                                      | 12.0<br>9.8<br>11.5<br>13.8  |                                 |                                      | 21.0<br>21.1<br>22.2<br>19.3 |                                |                                       |
| GA1934 <i>sir-2.1(ok434)</i>        | [C] 152/29<br>[1] 49/11<br>[2] 56/5<br>[3] 47/13 | 39.7<br>34.7<br>55.4<br>29.8 | 16.4<br>16.2<br>16.3<br>16.0 | -8.8<br>-9.5<br>-13.8<br>-5.5 | 0.0015<br>0.0104<br>0.0208<br>0.6623 | 12.7<br>12.6<br>13.0<br>12.0 | +5.8<br>+28.6<br>+13.0<br>-13.0 | 0.1766<br>0.0021<br>0.0434<br>0.0829 | 18.9<br>18.2<br>20.5<br>18.5 | -10.0<br>-13.7<br>-7.7<br>-4.0 | <0.0001<br>0.0001<br>0.1903<br>0.4606 |
| N2H + FUDR (control)                | [C] 149/21<br>[1] 39/11<br>[2] 50/10<br>[3] 60/0 | 38.2<br>48.7<br>30.0<br>41.7 | 17.0<br>17.1<br>18.0<br>16.2 |                               |                                      | 13.3<br>12.9<br>13.8<br>13.2 |                                 |                                      | 19.5<br>21.1<br>19.8<br>18.3 |                                |                                       |
| GA1934 <i>sir-2.1(ok434)</i> + FUDR | [C] 159/14<br>[1] 49/3<br>[2] 52/9<br>[3] 58/2   | 53.8<br>42.9<br>61.5<br>55.2 | 15.4<br>15.5<br>15.8<br>14.9 | -9.4<br>-9.4<br>-12.2<br>-8.0 | 0.0425<br>0.1462<br>0.2480<br>0.4294 | 12.5<br>12.0<br>13.8<br>11.6 | -6.0<br>-7.0<br>0.0<br>-12.1    | 0.0933<br>0.2310<br>0.4648<br>0.0111 | 18.7<br>18.1<br>19.1<br>19.1 | -4.1<br>-14.2<br>-3.5<br>+4.4  | 0.6881<br>0.0319<br>0.4270<br>0.4306  |

**Supplementary Table 9.** Mortality deconvolution of *sir-2.1(ok434)* mutant strains.

Trials were performed at 20°C, with 10 μM or no FUDR. [C], combined data from all trials, [n], trial number.

| Strain                                           | Number of deaths/<br>censored        | %P                          | All death                   |                                |                                   | P death                     |                               |                                   | p death                     |                                |                                   |
|--------------------------------------------------|--------------------------------------|-----------------------------|-----------------------------|--------------------------------|-----------------------------------|-----------------------------|-------------------------------|-----------------------------------|-----------------------------|--------------------------------|-----------------------------------|
|                                                  |                                      |                             | Mean lifespan (days)        | % change vs. control           | p vs. control (log rank)          | Mean lifespan (days)        | % change vs. control          | p vs. control (log rank)          | Mean lifespan (days)        | % change vs. control           | p vs. control (log rank)          |
| DR1564 <i>daf-2(m41); fln-2(ot611)</i> (control) | [C] 112/31<br>[1] 60/13<br>[2] 52/18 | <b>6.0</b><br>8.3<br>3.8    | <b>28.1</b><br>25.1<br>31.5 |                                |                                   | <b>13.1</b><br>14.4<br>10.0 |                               |                                   | <b>29.1</b><br>26.1<br>32.3 |                                |                                   |
| DR1547 <i>daf-2(m41); daf-12(m20)</i>            | [C] 92/36<br>[1] 49/15<br>[2] 43/21  | <b>54.9</b><br>53.1<br>58.1 | <b>21.4</b><br>20.8<br>22.1 | <b>-23.8</b><br>-17.4<br>-29.6 | <b>0.0069</b><br>0.1186<br>0.0381 | <b>11.4</b><br>12.3<br>10.4 | <b>-13.3</b><br>-14.3<br>+4.0 | <b>0.3396</b><br>0.3382<br>0.6746 | <b>33.9</b><br>30.2<br>38.4 | <b>+16.5</b><br>+15.9<br>+18.9 | <b>0.0322</b><br>0.1054<br>0.0780 |
| GA1945 <i>daf-2(m41)</i> (control)               | [C] 89/38<br>[1] 42/26<br>[2] 47/12  | <b>31.9</b><br>35.7<br>27.7 | <b>27.3</b><br>23.0<br>31.1 |                                |                                   | <b>12.8</b><br>14.9<br>9.8  |                               |                                   | <b>33.3</b><br>27.6<br>37.6 |                                |                                   |
| DR1547 <i>daf-2(m41); daf-12(m20)</i>            | [C] 92/36<br>[1] 49/15<br>[2] 43/21  | <b>54.9</b><br>53.1<br>58.1 | <b>21.4</b><br>20.8<br>22.1 | <b>-21.6</b><br>-9.9<br>-28.9  | <b>0.0005</b><br>0.2326<br>0.0956 | <b>11.4</b><br>12.3<br>10.4 | <b>-10.8</b><br>-17.3<br>+5.9 | <b>0.1488</b><br>0.0452<br>0.4816 | <b>33.9</b><br>30.2<br>38.4 | <b>+1.6</b><br>+9.8<br>+2.1    | <b>0.9812</b><br>0.6143<br>0.5211 |

**Supplementary Table 10.** Mortality deconvolution of *daf-2* and *daf-2; daf-12* strains.

Animals were raised at 15°C until L4, and shifted to 25°C for lifespan analysis. No FUDR. [C], combined data from all trials, [n], trial number.

| Strain                                  | Number of deaths/<br>censored                     | %P                           | All death                    |                                  |                                       | P death                      |                                 |                                      | p death                      |                               |                                      |
|-----------------------------------------|---------------------------------------------------|------------------------------|------------------------------|----------------------------------|---------------------------------------|------------------------------|---------------------------------|--------------------------------------|------------------------------|-------------------------------|--------------------------------------|
|                                         |                                                   |                              | Mean lifespan (days)         | % change vs. control             | p vs. control (log rank)              | Mean lifespan (days)         | % change vs. control            | p vs. control (log rank)             | Mean lifespan (days)         | % change vs. control          | p vs. control (log rank)             |
| N2H (control)                           | [C] 174/15<br>[1] 62/6<br>[2] 58/3<br>[3] 54/6    | 44.8<br>59.7<br>31.0<br>22.0 | 18.0<br>17.3<br>18.9<br>17.9 |                                  |                                       | 12.5<br>13.8<br>11.5<br>11.4 |                                 |                                      | 22.6<br>22.4<br>22.2<br>23.4 |                               |                                      |
| DA1116 <i>eat-2(ad1116)</i>             | [C] 152/25<br>[1] 49/8<br>[2] 54/6<br>[3] 49/11   | 14.3<br>16.3<br>11.1<br>14.3 | 22.9<br>22.3<br>23.9<br>22.5 | +27.2<br>+28.9<br>+26.5<br>+25.7 | <0.0001<br>0.0003<br>0.0001<br>0.0201 | 13.8<br>12.5<br>15.2<br>14.1 | +10.4<br>-9.4<br>+32.2<br>+23.7 | 0.0792<br>0.4350<br>0.0170<br>0.1080 | 24.4<br>24.2<br>25.0<br>23.8 | +8.0<br>+8.0<br>+12.6<br>+1.7 | 0.0183<br>0.2710<br>0.0050<br>0.7346 |
| N2M (control)                           | [C] 215/24<br>[1] 103/14<br>[2] 58/4<br>[3] 54/6  | 14.0<br>13.4<br>15.5<br>14.8 | 21.8<br>21.8<br>21.0<br>22.4 |                                  |                                       | 13.7<br>14.4<br>11.6<br>14.9 |                                 |                                      | 23.3<br>23.3<br>22.8<br>23.7 |                               |                                      |
| GA66 <i>eat-2(ad1116); fln-2(ot611)</i> | [C] 141/40<br>[1] 44/17<br>[2] 47/13<br>[3] 50/10 | 9.4<br>13.6<br>14.9<br>4.0   | 23.7<br>24.1<br>23.5<br>23.9 | +8.7<br>+10.6<br>+11.9<br>+6.7   | 0.0043<br>0.2197<br>0.0435<br>0.5114  | 16.2<br>15.0<br>16.6<br>18.5 | +18.2<br>+4.2<br>+43.1<br>+24.2 | 0.1444<br>0.9793<br>0.0062<br>0.5083 | 24.5<br>25.5<br>24.7<br>24.1 | +5.2<br>+9.4<br>+8.3<br>+1.7  | 0.0149<br>0.1552<br>0.0515<br>0.9300 |

**Supplementary Table 11.** Mortality deconvolution of *eat-2(ad1116)* outcrossed strains.

Trials were performed at 20°C, with no FUDR. [C], combined data from all trials, [n], trial number.

### Supplementary References

- 1 Viswanathan, M. & Guarente, L. Regulation of *Caenorhabditis elegans* lifespan by *sir-2.1* transgenes. *Nature* **477**, E1-2 (2011).
- 2 Burnett, C. *et al.* Absence of effects of Sir2 overexpression on lifespan in *C. elegans* and *Drosophila*. *Nature* **477**, 482-485 (2011).
- 3 Viswanathan, M., Kim, S. K., Berdichevsky, A. & Guarente, L. A role for SIR-2.1 regulation of ER stress response genes in determining *C. elegans* life span. *Dev. Cell* **9**, 605-615 (2005).
- 4 Ludwig, A. H. *et al.* Pheromone sensing regulates *Caenorhabditis elegans* lifespan and stress resistance via the deacetylase SIR-2.1. *Proc. Natl. Acad. Sci. U S A* **110**, 5522-5527 (2013).
