# Supplementary material for: A fln-2 mutation affects lethal pathology and lifespan in C. elegans
Source: PubMed Central journal article supplement (PMC6841690; doi:10.1038/s41467-019-13062-z), 2019-11-08
Supplement: 41467_2019_13062_MOESM3_ESM.pdf [file 41467_2019_13062_MOESM3_ESM.pdf]

## Description of Additional Supplementary Files

**File name:** Supplementary Data 1

**Description:** Ziehm table with full mortality data

**File name:** Supplementary Movie 1

**Description:** 3-Dimensional SPIM image of an infected pharynx on day 8 of adulthood (20°C) where the terminal bulb is infected with RFP labelled *E. coli*.
